# Supplementary material for: Pathways to economic viability: a pilot scale and techno-economic assessment for algal bioremediation of challenging waste streams
Source: Royal Society of Chemistry journal article supplement (doi:10.1039/d0ew00700e), 2020-01-01
Supplement: d0ew00700e1.pdf [file d0ew00700e1.pdf]

Supplementary Data

S.1 Characterisation of landfill leachate from the Virdior Erin landfill, Chesterfield, UK (2016).

| <b>Parameter</b>               | <b>Average value</b> | <b>Unit</b>        |
|--------------------------------|----------------------|--------------------|
| Ammonia                        | 3960                 | mg L <sup>-1</sup> |
| Chloride                       | 2500                 | mg L <sup>-1</sup> |
| Conductivity                   | 18600                | uS/cm              |
| pH                             | 8.6                  |                    |
| BOD                            | 60                   | mg L <sup>-1</sup> |
| COD                            | 3250                 | mg L <sup>-1</sup> |
| Suspended Solids               | 66.7                 | mg L <sup>-1</sup> |
| TOC (filtered sample)          | 974                  | mg L <sup>-1</sup> |
| TON                            | 2.83                 | mg L <sup>-1</sup> |
| Alkalinity – CaCO <sub>3</sub> | 8400                 | mg L <sup>-1</sup> |
| Phosphate                      | 0.3                  | mg L <sup>-1</sup> |
| Nitrite                        | 1.74                 | mg L <sup>-1</sup> |
| Nitrate                        | 1.09                 | mg L <sup>-1</sup> |
| Sulphate                       | 640                  | mg L <sup>-1</sup> |
